# Supplementary material for: Utilisation of adequately iodized salt and influencing factors among Malawian households with children under five years old: analysis of data from the multiple indicator cluster survey 6
Source: Research Square preprint supplement (doi:10.21203/rs.3.rs-7682985/v1), 2025-12-04
Supplement: Supplementary file 2 [file 6d211ce7b2a36c7c78cb8801.docx]

Table 2: Mixed effects logistic regression analysis evaluating factors associated with use of adequately iodized salt

| Characteristic | Crude OR (95% CI) | P – value | Adjusted OR (95% CI) | P – value |
| --- | --- | --- | --- | --- |
| Age of household head | 1.00 (0.99 – 1.0) | 0.492 |  |  |
| Sex of household head   - Female | 0.96 (0.88 – 1.1) | 0.409 |  |  |
| Region of residence   - Central - South | 0.66 (0.31 – 1.40)  0.48 (0.24 – 0.98) | 0.284  **0.043** | 0.78 (0.44 – 1.40)  0.57 (0.34 – 0.98) | 0.416  **0.042** |
| Area of residence   - Rural | 0.25 (0.17 – 0.39) | **<0.001** | 0.42 (0.28 – 0.65) | **<0.001** |
| Education of household head   - Primary - Lower secondary - Upper secondary - Higher - Vocational training | 1.12 (0.98 – 1.28)  1.41 (1.18 – 1.68)  1.67 (1.41 – 1.99)  3.13 (2.29 – 4.30)  2.05 (1.09 – 3.86) | 0.100  **<0.001**  **<0.001**  **<0.001**  **0.026** | 1.08 (0.95 – 1.24)  1.29 (1.07 – 1.54)  1.35 (1.13 – 1.61)  1.63 (1.17 – 2.30)  1.22 (0.64 – 2.33) | 0.238  **0.005**  **0.001**  **0.004**  0.531 |
| Income of household head   - Mean wealth score | 1.54 (1.45 – 1.65) | **<0.001** | 1.42 (1.33 – 1.54) | **<0.001** |

The ICC for the household was 0.134 (95% CI 0.09 – 0.20). The ICC for district strata was 0.132 (95% CI 0.09 – 0.20). The likelihood ratio test vs. the logistic model had a chi-square statistic of 645.90, and the p-value was <0.001. The multilevel logistic model showed good discriminative ability, with an approximate C-statistic (ROC) of 0.72 (95% CI 0.71 – 0.73).
