# Supplementary material for: Utilisation of adequately iodized salt and influencing factors among Malawian households with children under five years old: analysis of data from the multiple indicator cluster survey 6
Source: Research Square preprint supplement (doi:10.21203/rs.3.rs-7682985/v1), 2025-12-04
Supplement: Supplementary file 3 [file efd57dcbef312f682138e057.docx]

Table 1: Baseline characteristics of the study population

|  | Adequately iodized salt utilization in the household with under – 5 children | |  |
| --- | --- | --- | --- |
| Characteristic | Yes  (N = 6804) | No  (N = 4242) | P – value |
| Age of household head   - Mean (standard deviation) | 38 (13.0) | 37 (12.9) | 0.388 |
| Sex of household head, n (%)   - Male - Female | 5077 (75%)  1727 (25%) | 3092 (73%)  1150 (27%) | **0.044** |
| Region of residence, n (%)   - North - Central - South | 1673 (25%)  2051 (30%)  3080 (45%) | 660 (16%)  1555 (37%)  2027 (48%) | **<0.001** |
| Area of residence, n (%)   - Urban - Rural | 1274 (19%)  5530 (81%) | 214 (5%)  4028 (95%) | **<0.001** |
| Education of household head, n(%)   - Pre-primary or none - Primary - Lower secondary - Upper secondary - Higher - Vocational training - Missing/DK | 613 (9%)  3766 (55%)  845 (12%)  1184 (17%)  332 (5%)  5 (0.8%)  9 (0.1%) | 511 (12%)  2741 (64%)  436 (10%)  472 (11%)  61 (1.4%)  15 (0.4%)  6 (0.1%) | **<0.001** |
| Income of household head   - Mean wealth score (standard deviation) | 0.124 (1.03) | -0.297 (0.67) | **<0.001** |
| Ethnicity of household head, n (%)   - Chewa - Tumbuka - Yao - Lomwe - Tonga - Sena - Nkhonde - Ngoni - Other | 1784 (26%)  710 (10%)  737 (11%)  1071 (16%)  282 (4%)  467 (7%)  152 (2%)  800 (12%)  801 (12%) | 1592 (38%)  406 (10%)  465 (11%)  782 (18%)  142 (3%)  171 (4%)  23 (0.5%)  486 (11%)  175 (4%) | **<0.001** |
| Religion of household head, n (%)   - Christianity - Islam - Hinduism - Traditional - Other religion - No religion - No response | 5735 (84%)  787 (12%)  4 (0.1%)  17 (0.3%)  123 (2%)  137 (2%)  1 (0.0%) | 3511 (83%)  530 (12%)  5 (0.1%)  21 (0.5%)  54 (1%)  118 (3%)  3 (0.1%) | **0.001** |
