# Supplementary figures and images for: Utilisation of adequately iodized salt and influencing factors among Malawian households with children under five years old: analysis of data from the multiple indicator cluster survey 6
Source: Research Square preprint supplement (doi:10.21203/rs.3.rs-7682985/v1), 2025-12-04

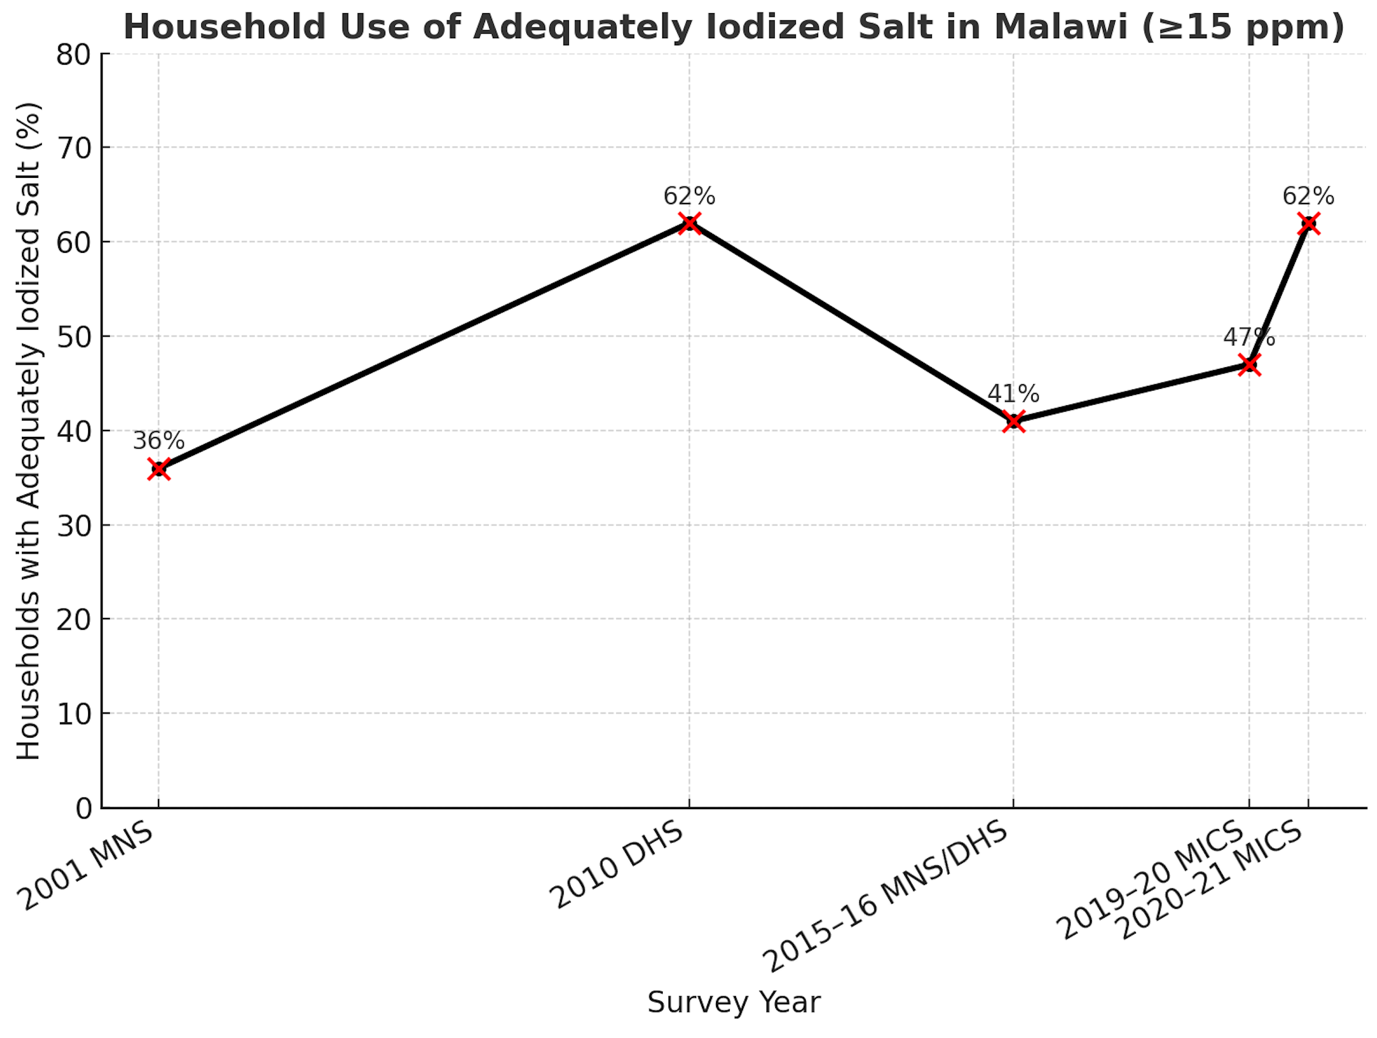


Supplementary figure S1. Trend in the level of utilization of adequately iodized salt in Malawi

Supplement: Supplementary file 1 [file 5c0039b5d2235eec4daf2eb4.docx]
